# Supplementary material for: Apply a Physiologically Based Pharmacokinetic Model to Promote the Development of Enrofloxacin Granules: Predict Withdrawal Interval and Toxicity Dose
Source: MDPI journal article supplement (doi:10.3390/antibiotics10080955), 2021-08-08
Supplement: s1 [file s1]

---

## *Supplementary Information*

# **Apply a Physiologically Based Pharmacokinetic Model to Promote the Development of Enrofloxacin Granules: Predict Withdrawal Interval and Toxicity Dose**

**Kaixiang Zhou <sup>1</sup>, Aimei Liu <sup>1</sup>, Wenjin Ma <sup>1</sup>, Lei Sun <sup>1</sup>, Kun Mi <sup>1</sup>, Xiangyue Xu <sup>1</sup>, Samah Attia Algharib <sup>1,2</sup>, Shuyu Xie <sup>1,3</sup> and Lingli Huang <sup>1,3,\*</sup>**

<sup>1</sup> National Reference Laboratory of Veterinary Drug Residues (HZAU) and MAO Key Laboratory for Detection of Veterinary Drug Residues, Wuhan 430070, China; flyingkai@webmail.hzau.edu.cn (K.Z.); 2018302010040@webmail.hzau.edu.cn (A.L.); mawenjin@webmail.hzau.edu.cn (W.M.); sunlei@webmail.hzau.edu.cn (L.S.); mikun@webmail.hzau.edu.cn (K.M.); xuxiangyue@webmail.hzau.edu.cn (X.X.); samah.alghareeb@fvtm.bu.edu.eg (S.A.A.); xieshuyu@mail.hzau.edu.cn (S.X.)

<sup>2</sup> Department of Clinical Pathology, Faculty of Veterinary Medicine, Benha University, Moshtohor, Toukh 13736, Egypt

<sup>3</sup> MOA Laboratory for Risk Assessment of Quality and Safety of Livestock and Poultry Products, Huazhong Agricultural University, Wuhan 430070, China

\* Correspondence: huanglingli@mail.hzau.edu.cn; Tel.: +86-027-8728-7186

# Content

|                                                                                                                                                                                                                                                                                                                                                                                              |   |
|----------------------------------------------------------------------------------------------------------------------------------------------------------------------------------------------------------------------------------------------------------------------------------------------------------------------------------------------------------------------------------------------|---|
| Table S1. The potential dosage regimen of ENR-SD granules against common intestine bacterial in swine                                                                                                                                                                                                                                                                                        | 3 |
| Table S2. The ENR and CIP concentration of tissues in the pig (Mean $\pm$ SD, n=3) .....                                                                                                                                                                                                                                                                                                     | 3 |
| Table S3. Sensitive parameters identified by the sensitivity analysis.....                                                                                                                                                                                                                                                                                                                   | 3 |
| Table S4. Values and distributions of parameters used in the MC analysis.....                                                                                                                                                                                                                                                                                                                | 4 |
| Table S5. WTs in muscle, fat, liver, and kidney calculated by the PBPK model or the WT 1.4 software method at a dose of 5 mg/kg twice per day for 5 days.....                                                                                                                                                                                                                                | 4 |
| Table S6. The Viability of pig hepatocytes at different concentration of ENR and CIP (Mean $\pm$ SD, n=3)                                                                                                                                                                                                                                                                                    | 4 |
| Table S7. Physiological parameters used in the PBPK model for ENR in swine .....                                                                                                                                                                                                                                                                                                             | 5 |
| Table S8. Chemical-specific parameters used in the PBPK model for ENR in swine....                                                                                                                                                                                                                                                                                                           | 5 |
| Figure S1. The fitting of observed plasma data with predicted data (A) and regression analysis of PBPK model (B). The predicted plasma concentration was well fitted by the observed concentration ( $R^2=0.9283$ )                                                                                                                                                                          | 6 |
| Figure S2. The liner linear regression analysis of observed tissue residue concentration of ENR with predicted data (A), observed tissue residue concentration of CIP with predicted data (B), and observed tissue residue concentration of ENR+CIP with predicted data (C). The was predicted tissue residue concentration well fitted by the observed concentration ( $R^2 > 0.82$ ) ..... | 6 |
| Figure S3. The measured WTs of ENR granules in muscle (A), fat (B), liver (C) and kidney (D) of the pig at a dose of 5 mg/kg b.w. twice per day for 5 days. The measured WT of ENR granules in muscle, fat, liver, and kidney of pigs was 3 d, 2 d, 4 d, and 6 d, respectively.....                                                                                                          | 7 |
| The method of pig hepatocytes isolation.....                                                                                                                                                                                                                                                                                                                                                 | 8 |
| PBPK model code for acslX.....                                                                                                                                                                                                                                                                                                                                                               | 9 |

**Table S1.** The potential dosage regimen of ENR-SD granules against common intestine bacterial in swine.

| Pathogens                                    | MIC <sub>90</sub> (µg/mL) | Dosage regimen       | AUC <sub>24h</sub> (µg h/mL) | AUCI |
|----------------------------------------------|---------------------------|----------------------|------------------------------|------|
| <i>Salmonella</i> (n=291) <sup>a,b</sup>     | 8.0                       | 2.5 mg/kg, twice/day | 957                          | 120  |
| <i>Salmonella</i> (n=291) <sup>a,b</sup>     | 8.0                       | 5.0 mg/kg, once/day  | 1065                         | 133  |
| <i>E. coli</i> (n=918) <sup>c</sup>          | 0.25                      | 5.0 mg/kg, once/day  | 1065                         | 4260 |
| <i>L. intracellularis</i> (n=1) <sup>d</sup> | 8.0                       | 5.0 mg/kg, once/day  | 1065                         | 133  |
| <i>Camp. Jejuni</i> (n=114) <sup>e</sup>     | 16.0                      | 7.5 mg/kg, once/day  | 1542                         | 96   |
| <i>Camp. Jejuni</i> (n=114) <sup>e</sup>     | 16.0                      | 5.0 mg/kg, twice/day | 1884                         | 118  |
| <i>Camp. Jejuni</i> (n=114) <sup>e</sup>     | 16.0                      | 10 mg/kg, once/day   | 2130                         | 133  |

Note: <sup>a</sup>Hao et al., 2013; <sup>b</sup>Cao et al., 2017; <sup>c</sup>Wang et al., 2016; <sup>d</sup>Wattanaphansak et al., 2019; <sup>e</sup>Shin et al., 2007; intracellular MIC, only one isolated; AUCI, the ratio of AUC<sub>24h</sub>/MIC, when AUCI was above 120, the good antibacterial ability against gram-negative bacteria can be expected (Craig, 2001; Schuck et al., 2005); All bacterial were isolated from swine.

**Table S2.** The ENR and CIP concentration of tissues in the pig (Mean ± SD, n=3).

| Tissues | Time (d) | ENR (µg/g)  | CIP (µg/g)  | Total (µg/g) | MRL (µg/g) |
|---------|----------|-------------|-------------|--------------|------------|
| Muscle  | 0.042    | 3.13±0.111  | 0.644±0.108 | 3.774        | 0.1        |
|         | 0.5      | 1.839±0.076 | 0.387±0.040 | 2.226        |            |
|         | 1        | 0.719±0.007 | 0.239±0.010 | 0.958        |            |
|         | 2        | 0.139±0.027 | 0.097±0.021 | 0.236        |            |
|         | 3        | 0.039±0.006 | 0.019±0.003 | 0.058        |            |
|         | 5        | < LOD       | < LOD       | /            |            |
| Fat     | 0.042    | 1.183±0.108 | 0.164±0.013 | 1.347        | 0.1        |
|         | 0.5      | 0.382±0.040 | 0.111±0.079 | 0.493        |            |
|         | 1        | 0.178±0.006 | 0.061±0.021 | 0.239        |            |
|         | 2        | 0.049±0.017 | 0.036±0.011 | 0.085        |            |
|         | 3        | < LOD       | < LOD       | /            |            |
|         | 5        | < LOD       | < LOD       | /            |            |
| Liver   | 0.042    | 6.817±0.047 | 2.341±0.397 | 9.158        | 0.2        |
|         | 0.5      | 1.934±0.054 | 1.350±0.038 | 3.284        |            |
|         | 1        | 0.692±0.035 | 0.843±0.171 | 1.535        |            |
|         | 2        | 0.184±0.067 | 0.602±0.234 | 0.786        |            |
|         | 3        | 0.082±0.005 | 0.124±0.004 | 0.206        |            |
|         | 5        | < LOD       | < LOD       | /            |            |
| Kidney  | 0.042    | 6.270±0.504 | 1.604±0.109 | 7.874        | 0.3        |
|         | 0.5      | 2.852±0.282 | 1.160±0.097 | 4.012        |            |
|         | 1        | 1.301±0.310 | 1.0±0.194   | 2.301        |            |
|         | 2        | 0.432±0.131 | 0.292±0.119 | 0.724        |            |
|         | 3        | 0.221±0.027 | 0.040±0.012 | 0.261        |            |
|         | 5        | < LOD       | < LOD       | /            |            |

**Note:** The MRLs was cited form Codex Alimentarius Commission (CAC), 2017. Maximum residue limits (MRLs) and risk management recommendations (RMRs) for residues of veterinary drugs in foods. CAC/MRL 2-2017. Both the LOD and LOQ were 0.02 µg/mL.

**Table S3. Sensitive parameters identified by the sensitivity analysis.**

| Response | Cmtotalmg | Cftotalmg | Cltotalmg | Cktotalmg |
|----------|-----------|-----------|-----------|-----------|
| BW       | -2.2      | -2.0      | -1.8      | -2.1      |
| Frac     | 0.37      | -0.5      | -0.6      | -0.4      |
| Kmc      | -1.5      | -1.4      | -1.2      | -1.4      |
| Kurinecl | -0.7      | -0.8      | -1.1      | -0.9      |
| Kurinec  | -1.5      | -1.4      | -1.3      | -1.6      |
| Pf       | 0.2       | 0.8       | 0.2       | 0.2       |
| Pf1      | /         | 0.5       | /         | /         |
| Pk       | /         | /         | /         | 0.6       |
| Pk1      | /         | /         | /         | 0.4       |
| Pl       | -2.1      | -1.9      | -1.3      | -2.0      |
| Pl1      | /         | /         | 0.7       | /         |
| Pm       | 2.0       | 1.3       | 1.2       | 1.3       |
| Pm1      | 0.6       | 0.2       | 0.3       | 0.2       |

Note: Only parameters with  $|NSC| \geq 0.2$  are presented in the table. Cmtotalmg, Cftotalmg, Cltotalmg, and Cktotalmg represent the final concentration of ENR plus CIP in the muscle, fat, liver and kidney, respectively.

**Table S4. Values and distributions of parameters used in the MC analysis.**

| Parameters | Mean  | SD     | CV (%) | Lower Bound | Upper Bound |
|------------|-------|--------|--------|-------------|-------------|
| BW         | 55.0  | 10.0   | 0.182  | 45.0        | 65.0        |
| Frac       | 0.35  | 0.105  | 0.3    | 0.245       | 0.455       |
| Kmc        | 0.035 | 0.0105 | 0.3    | 0.0245      | 0.0455      |
| Kurinelc   | 0.35  | 0.105  | 0.3    | 0.245       | 0.455       |
| Kurinec    | 0.2   | 0.036  | 0.3    | 0.184       | 0.236       |
| Pf         | 0.6   | 0.12   | 0.2    | 0.48        | 0.72        |
| Pf1        | 0.53  | 0.106  | 0.2    | 0.424       | 0.636       |
| Pk         | 5.5   | 1.1    | 0.2    | 4.4         | 6.6         |
| Pk1        | 5.5   | 1.1    | 0.2    | 4.4         | 6.6         |
| Pl         | 3.2   | 0.64   | 0.2    | 2.56        | 3.64        |
| Pl1        | 4.3   | 0.86   | 0.2    | 3.44        | 5.16        |
| Pm         | 2.5   | 0.5    | 0.2    | 2.0         | 3.0         |
| Pm1        | 1.5   | 0.5    | 0.2    | 1.0         | 2.0         |

**Table S5. WT<sub>s</sub> in muscle, fat, liver, and kidney calculated by the PBPK model or the WT 1.4 software method at a dose of 5 mg/kg twice per day for 5 days.**

| Tissues | Predicted WT (d) | Measured WT (d) |
|---------|------------------|-----------------|
| Muscle  | 5                | 3               |
| Fat     | 3                | 2               |
| Liver   | 6                | 4               |
| kidney  | 4                | 6               |

**Table S6. The Viability of pig hepatocytes at different concentration of ENR and CIP (Mean±SD, n=3).**

| Concentration (μg/mL) | Viability (%) |             |
|-----------------------|---------------|-------------|
|                       | ENR (%)       | CIP (%)     |
| 50                    | 106.15±6.83   | /           |
| 100                   | 96.22±2.92    | 103.80±1.13 |
| 250                   | 45.15±1.95    | 88.47±7.44  |
| 500                   | 13.83±0.56    | 58.86±3.70  |
| 1000                  | 7.27±2.07     | 7.48±0.20   |

**Table S7. Physiological parameters used in the PBPK model for ENR in swine.**

| Parameter                        | Abbreviation | Value <sup>c</sup> |
|----------------------------------|--------------|--------------------|
| Body weight (kg)                 | BW           | 55                 |
| Cardiac output (L/h/kg)          | QCC          | 5                  |
| <b>Tissue volume<sup>a</sup></b> |              |                    |
| Blood                            | VBloodC      | 0.06               |
| Liver                            | VLC          | 0.0247             |
| Kidney                           | VKC          | 0.004              |
| Muscle                           | VMC          | 0.4                |
| Fat                              | VFC          | 0.32               |
| Lung                             | VLuC         | 0.01               |
| Rest of body                     | VrestC       | 0.1813             |
| <b>Blood flow<sup>b</sup></b>    |              |                    |
| Liver                            | QLC          | 0.2725             |
| Kidney                           | QKC          | 0.12               |
| Muscle                           | QMC          | 0.251              |
| Fat                              | QFC          | 0.1275             |
| Rest of body                     | QrestC       | 0.229              |

Note: <sup>a</sup>fraction of body weight, unitless; <sup>b</sup>fraction of cardiac output, unitless; Lin et al., 2016.

**Table S8. Chemical-specific parameters used in the PBPK model for ENR in swine.**

| Parameter                                                                     | Abbreviation | Value <sup>a</sup> |
|-------------------------------------------------------------------------------|--------------|--------------------|
| <i>Absorption rate constant (/h)</i>                                          |              |                    |
| Gastric emptying                                                              | Kst          | 2.0                |
| Intestinal absorption                                                         | Ka           | 0.55               |
| Intramuscular                                                                 | Kim          | 0.0                |
| Subcutaneous                                                                  | Ksc          | 0.0                |
| <i>Tissue:plasma partition coefficient for the enrofloxacin (unitless)</i>    |              |                    |
| Liver                                                                         | Pl           | 3.2                |
| Kidney                                                                        | Pk           | 5.5                |
| Muscle                                                                        | Pm           | 2.5                |
| Fat                                                                           | Pf           | 0.6                |
| Lung                                                                          | Plu          | 4.3                |
| Rest of body                                                                  | Prest        | 8.0                |
| <i>Tissue:plasma partition coefficient for the main metabolite (unitless)</i> |              |                    |
| Liver                                                                         | PL1          | 4.3                |
| Kidney                                                                        | PK1          | 5.5                |
| Muscle                                                                        | PM1          | 1.5                |
| Fat                                                                           | PF1          | 0.53               |
| Lung                                                                          | Plu1         | 4.3                |
| Rest of body                                                                  | Prest1       | 8.0                |
| Hepatic metabolic rate [/(h*kg)]                                              | KmC          | 0.035              |
| Fraction of enrofloxacin metabolized to the main metabolite (unitless)        | Frac         | 0.35               |
| <i>Percentage of plasma protein binding (unitless)</i>                        |              |                    |
| Enrofloxacin                                                                  | PB           | 0.46               |
| Main metabolite                                                               | PB1          | 0.19               |
| Fecal elimination rate constant (/h)                                          | Kfeces       | 0.01               |
| <i>Urinary elimination rate constant (L/h/kg)</i>                             |              |                    |
| Enrofloxacin                                                                  | KurineC      | 0.12               |
| Main metabolite                                                               | Kurine1C     | 0.35               |

Note: <sup>a</sup>Lin et al, 2016.

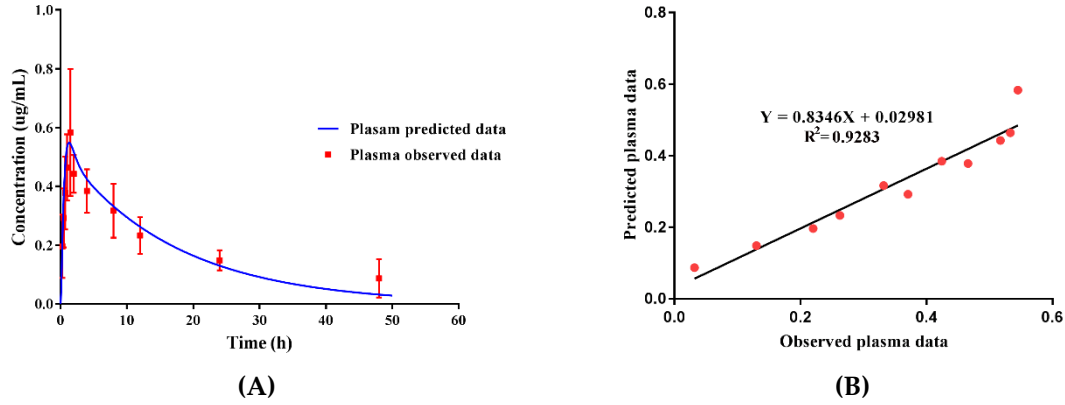

**Figure S1.** The fitting of observed plasma data with predicted data (A) and regression analysis of PBPK model (B). The predicted plasma concentration was well fitted by the observed concentration ( $R^2=0.9283$ ).

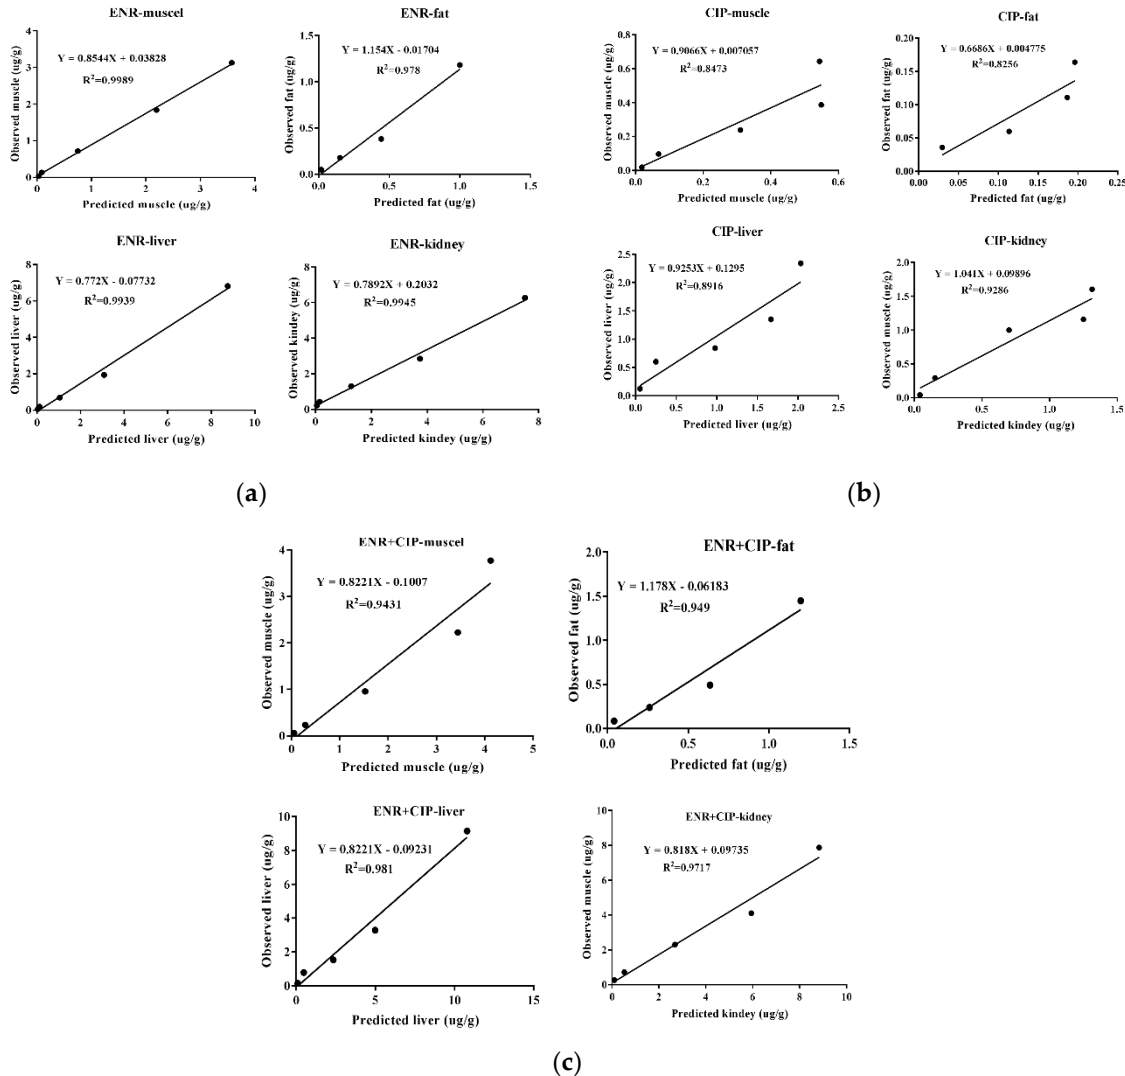

**Figure S2.** The liner linear regression analysis of observed tissue residue concentration of ENR with predicted data (A), observed tissue residue concentration of CIP with predicted data (B), and observed tissue residue concentration of ENR+CIP with predicted data (C). The was predicted tissue residue concentration well fitted by the observed concentration ( $R^2 > 0.82$ )

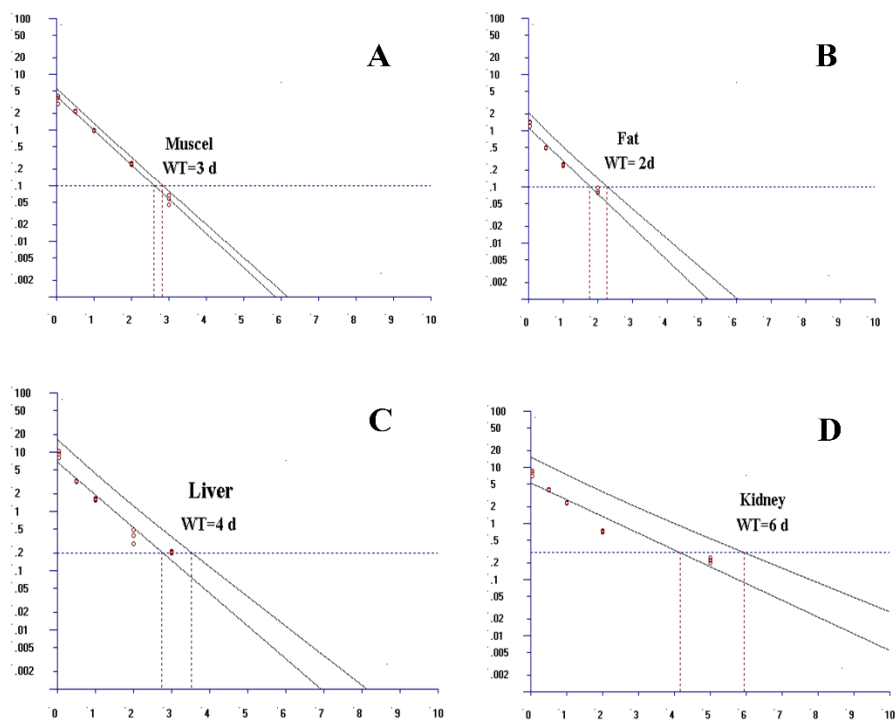

**Figure S3.** The measured WTs of ENR granules in muscle (A), fat (B), liver (C) and kidney (D) of the pig at a dose of 5 mg/kg b.w. twice per day for 5 days. The measured WT of ENR granules in muscle, fat, liver, and kidney of pigs was 3 d, 2 d, 4 d, and 6 d, respectively.

## **File S1: The Method of Pig Hepatocytes Isolation**

During the residue elimination experiment, the pig was killed by bloodletting. After the abdominal skin was sterilized with 70% alcohol, the abdominal cavity was opened immediately, and a leaf of liver was cut. Then rinse blood repeatedly with ice-cold PBS, and transfer the liver to the super-clean workbench. After that the a 50 mL needle with the perfusion buffer preheated at 37°C was inserted into the larger blood vessels, and slowly inject until the liver is obviously enlarged. After the color becomes light, then inject the perfusion buffer without EDTA at a speed of 30 mL/min, and then perfuse it vertically at about 300 mL. And then, the digestion buffer containing 0.05% collagenase IV preheated at 37°C was replaced and perfused at a speed of 20 mL/min for 20 min. The digested loose liver was quickly placed in a sterilized dish, removing the undigested liver envelope and connective tissue with sterile forceps, add 20 mL of the above 0.08% collagenase IV digestion buffer, cut the liver with forceps, and shake gently. After the cells completely detached, add 20 mL of culture solution containing 10% fetal bovine serum to stop digestion. The above cell precipitates were resuspended and filtered through 200 mesh stainless steel wire mesh to remove residual tissues and cell clumps. Transferred above mixture into a 15 mL centrifuge tube and centrifuged at 800 r/min for 3 min, then resuspended with DMEM culture solution, centrifuged at 800 r/min for 5 min, repeated twice. After discarded the supernatant, the cell precipitates were resuspended with DMEM culture solution for the further culture.



## File S2: PBPK Model Code for acslX

Note: The model code below represents a physiologically based pharmacokinetic (PBPK) model for enrofloxacin swine. Parameter values for the studied drugs in swine are provided in Supplementary Tables 2 and Supplementary Tables 3. The PBPK model of other drugs in other animal species can be built based on this code by change the original parameter values.

PROGRAM

INITIAL

! code that is executed once at the beginning of a simulation run goes here

!! Physiological parameters

! Blood flow rates (fraction of cardiac output)

CONSTANT QCC = 5 ! Cardiac output index (L/h/kg), also blood flow of lung, from Upton (2008)

CONSTANT QLC = 0.2725 ! liver, average from Buur et al. (2005) and Upton (2008)

CONSTANT QKC = 0.12 ! kidney, average from Buur et al. (2005) and Upton (2008)

CONSTANT QMC = 0.251 ! Muscle, average from Buur et al. (2005) and Upton (2008)

CONSTANT QFC = 0.1275 ! Fat, average from Buur et al. (2005) and Upton (2008)

! Tissue volumes (fraction of body weight)

CONSTANT BW = 55 ! Kg, body weight was study-specific; This value was actual BW in present study

CONSTANT VLC = 0.0247 ! liver, average from Buur et al. (2005) and Upton (2008)

CONSTANT VKC = 0.004 ! Kidneys, average from Buur et al. (2005) and Upton (2008)

CONSTANT VMC = 0.40 ! Muscle, average from Buur et al. (2005) and Upton (2008)

CONSTANT VFC = 0.32 ! Fat, adipose tissue, average from Buur et al. (2005) and Upton (2008)

CONSTANT VLuC = 0.01 ! Lungs, average from Buur et al. (2005) and Upton (2008)

CONSTANT VBloodC = 0.06 ! Blood, average from Buur et al. (2005) and Upton (2008)

CONSTANT VSiC = 0.036 ! Small intestine

!! Mass transfer parameters (Chemical-specific parameters)

! Chemical molecular weights and unit conversion factors, from PubChem

CONSTANT MW = 359.4 ! g/mol, enrofloxacin

CONSTANT MW1 = 331.34 ! g/mol, ciprofloxacin

CONSTANT MWmol = 2.78 ! umol/mg, enrofloxacin, from mg to umol

CONSTANT MWmg = 0.36 ! mg/umol, enrofloxacin, from umol to mg

! Kinetic constants

! Oral absorption and fecal elimination rate constants (for enrofloxacin)

CONSTANT Kst = 2 ! /h, gastric emptying rate constant

CONSTANT Ka = 0.55 ! /h, intestinal absorption rate constant

CONSTANT Kfeces = 0.01 ! /h, intestinal transit rate constant (fecal elimination rate constant)

! IV infusion/injection rate constants

CONSTANT Timeiv = 0.01 ! h, IV infusion/injection time

! IM absorption rate constants (set parameter value equal to 0.0 when not used in a particular simulation)

CONSTANT Kim = 0.0 ! /h, intramuscular absorption rate constant

! SC absorption rate constants

CONSTANT Ksc = 0.0 ! /h, subcutaneous absorption rate constant

! Partition coefficients for enrofloxacin (PC, unitless)

! The values from Buur et al. 2005 were used as initial values for further estimation.

CONSTANT PL = 3.2 ! Liver:plasma PC

CONSTANT PK = 5.5 ! Kidney:plasma PC

CONSTANT PM = 2.5 ! Muscle:plasma PC

CONSTANT PF = 0.6 ! Fat:plasma PC

CONSTANT PLu = 4.3 ! Lung:plasma PC

CONSTANT Prest = 8 ! Rest-of-body:plasma PC

! Partition coefficients for the ciprofloxacin (usually designated as the ciprofloxacin) (PC, unitless)

CONSTANT PL1 = 4.3 ! Liver:plasma PC

CONSTANT PK1 = 5.5 ! Kidney:plasma PC

CONSTANT PM1 = 1.5 ! Muscle:plasma PC

CONSTANT PF1 = 0.53 ! Fat:plasma PC

CONSTANT PLu1 = 4.3 ! Lung:plasma PC

CONSTANT Prest1 = 8 ! Rest-of-body:plasma PC

! Percentage plasma protein binding (unitless), Buur et al. (2005)

CONSTANT PB = 0.46 ! Percentage of enrofloxacin bound to plasma proteins

CONSTANT PB1 = 0.19 ! Percentage of the ciprofloxacin bound to plasma proteins

! Metabolic rate constants

CONSTANT KmC = 0.035 ! /(h\*kg), liver metabolic rate constant of the enrofloxacin

CONSTANT Frac = 0.35 ! Unitless, fraction of enrofloxacin metabolized to the ciprofloxacin

! Urinary elimination rate constants

CONSTANT KurineC = 0.12 ! L/h/kg, for enrofloxacin

CONSTANT Kurine1C = 0.35 ! L/h/kg, for the ciprofloxacin

CONSTANT PDOSEoral = 130 ! mg/kg

CONSTANT PDOSEiv = 0 ! mg/kg

CONSTANT PDOSEim = 0 ! mg/kg

CONSTANT PDOSEsc = 0 ! mg/kg

END ! INITIAL

DYNAMIC

ALGORITHM IALG = 2

NSTEPS NSTP = 10

MAXTERVAL MAXT = 1.0e9

MINTERVAL MINT = 1.0e-9

CINTERVAL CINT = 0.1

DERIVATIVE

! code for calculating the derivative goes here

! Cardiac output and blood flows to tissues (L/h)

$QC = QCC * BW$  ! Cardiac output

$QL = QLC * QC$  ! Blood flow to the liver

$QK = QKC * QC$  ! Blood flow to the kidney

$QM = QMC * QC$  ! Blood flow to the muscle

$QF = QFC * QC$  ! Blood flow to the fat

$Q_{rest} = QC - QL - QK - QM - QF$  ! Blood flow to the rest of body

! Tissue volumes (L)

$VL = VLC * BW$  ! Liver

$VK = VKC * BW$  ! Kidney

$VM = VMC * BW$  ! Muscle

$VF = VFC * BW$  ! Fat

$VLu = VLuC * BW$  ! Lung

$VBlood = VBloodC * BW$  ! Blood

$V_{ven} = VBlood * 0.74$  ! Venous blood

$V_{art} = VBlood * 0.26$  ! Arterial blood

$V_{rest} = BW - VL - VK - VM - VF - VLu - VBlood$  ! Rest of body

$V_{Si} = VSiC * BW$  ! Small intestine

! Dosing amounts (mg converted to umol)

$DOSE_{oral} = PDSE_{oral} * BW * MW_{mol}$  ! umol

$DOSE_{iv} = PDSE_{iv} * BW * MW_{mol}$  ! umol

$DOSE_{im} = PDSE_{im} * BW * MW_{mol}$  ! umol

$DOSE_{sc} = PDSE_{sc} * BW * MW_{mol}$  ! umol

! Multiple oral dosing using the PULSE/EXPOSURE function

CONSTANT  $t_{len} = 0.001$  ! Length of exposure, oral, iv, im, or sc (h/day)

CONSTANT  $t_{interval} = 12$  ! administration interval, varied dependent on the exposure paradigm (h)

CONSTANT  $D_{start} = 0.0$  ! Initiation day of exposure (day)

CONSTANT  $D_{stop} = 5$  ! Termination day of exposure (day)

CONSTANT  $MAXT = 1.0$  ! maximum comm. interval

CONSTANT CINTC = 0.1 ! Communication interval

CINT = CINTC ! Communication interval

Tsim=TSTOP\*24 ! Tstop in hours

DS=Dstart\*24 ! Initiation time point of exposure (h)

Doff=(Dstop-Dstart)\*24 ! Exposure duration (h)

TimeOn=Dstart\*24 ! Initiation time point of exposure (h)

TimeOff=Dstop\*24+tlen ! Termination time point of exposure (h)

Exposure=PULSE(0,tinterval,tlen)\*PULSE(DS,Tsim,Doff) ! Exposure paradigm

RDOSEoral=(DOSEoral/tlen)\*Exposure ! Administration rate

RAST=RDOSEoral-Kst\*AST ! Rate in the stomach

AST=Integ(RAST,0)/0.0 or Doseoral if the initial dose is twice as the subsequent dose.

RAI=Kst\*AST-Ka\*AI-Kfeces\*AI ! Rate in the intestine

Rfeces=Kfeces\*AI ! Fecal elimination rate

Afeces=Integ(Rfeces,0.0) ! Amount eliminated through feces

AI=Integ(RAI,0.0) ! Amount in the intestine

CAI=AI/VS<sub>i</sub> ! Concentration of the enrofloxacin in small intestine,  $\mu\text{mol/L}$

CA<sub>img</sub>=AI\*MW<sub>wg</sub> ! Concentration of the total enrofloxacin in small intestine, unit conversion from  $\mu\text{mol/L}$  to  $\text{mg/L}$  ( $\mu\text{g/g}$ )

RAO=Ka\*AI ! Oral absorption rate

AAO=Integ(RAO,0.0) ! Amount absorbed

! Single IV dosing to the venous

IVR=DOSE<sub>iv</sub>/time<sub>iv</sub>

RIV=IVR\*(1.0-step(time<sub>iv</sub>)) ! Intravenous injection rate

AIV=Integ(RIV,0.0) ! Amount injected

! Single IM exposure

Rim=Kim\*Aim<sub>site</sub> ! Intramuscular absorption rate

Aim=Integ(Rim,0.0) ! Amount absorbed via IM route

Rim<sub>site</sub>=-Kim\*Aim<sub>site</sub> ! Rate of changes in the amount of the drug in the injection site

Aim<sub>site</sub>=Integ(Rim<sub>site</sub>,Dose<sub>im</sub>) ! Amount of the drug remained in the injection site

! Multiple IM exposure (if needed)

$!RDOSE_{im} = (DOSE_{im} / tlen) * Exposure$

$!Rim_{site} = RDOSE_{im} - Kim * Aim_{site}$

$!Aim_{site} = Integ(Rim_{site}, 0.0)$

$!Rim = Kim * Aim_{site}$

$!Aim = Integ(Rim, 0.0)$

! Single SC exposure

$Rsc = Ksc * Asc_{site}$  ! Subcutaneous absorption rate

$Asc = Integ(Rsc, 0.0)$  ! Amount absorbed via SC route

$Rsc_{site} = -Ksc * Asc_{site}$  ! Rate of changes in the amount of the drug in the injection site

$Asc_{site} = Integ(Rsc_{site}, Doses_{sc})$  ! Amount of the drug remained in the injection site

! Metabolic rate

$Km = KmC * BW$  ! h<sup>-1</sup>

! Urinary elimination rates

$Kurine = KurineC * BW$  ! L/h, for the enrofloxacin

$Kurine1 = Kurine1C * BW$  ! L/h, for the ciprofloxacin

! \*\*\*\*\*Sub-model for the enrofloxacin (enrofloxacin)\*\*\*\*\*

! Venous blood/plasma

$RV = QL * CVL + QK * CVK + QM * CVM + QF * CVF + Qrest * CVrest + Riv + Rim + Rsc - QC * CV$  ! Rate, umol/h

$AV = Integ(RV, 0.0)$  ! Amount, umol

$CV = AV / Vven$  ! Concentration of the total enrofloxacin (free plus bound), umol/L

$CV_{free} = CV * (1 - PB)$  ! Concentration of the enrofloxacin that is free, umol/L

$CV_{bound} = CV * PB$  ! Concentration of the enrofloxacin that is bound, umol/L

$CV_{mg} = CV * MW_{mg}$  ! Concentration of the total enrofloxacin (free plus bound), unit conversion from umol/L to mg/L (ug/g)

! Arterial blood/plasma

$RA = QC * CVLu - QC * CA_{free}$  ! Rate, umol/h

$AA = Integ(RA, 0.0)$  ! Amount, umol

$CA = AA / Vart$  ! Concentration of the total enrofloxacin (free plus bound), umol/L

$CA_{free} = CA * (1 - PB)$  ! Concentration of the enrofloxacin that is free, umol/L

$CA_{bound} = CA * PB$  ! Concentration of the enrofloxacin that is bound, umol/L

$AB_{blood} = AV + AA$  ! Amount of the total drug in the blood, umol

! Lung compartment

$RA_{Lu} = QC * (CV - CV_{Lu})$  ! Rate, umol/h

$ALu = \text{Integ}(RA_{Lu}, 0.0)$  ! Amount, umol

$CLu = ALu / V_{Lu}$  ! Concentration of the total enrofloxacin in the lung, umol/L

$CV_{Lu} = CLu / PLu$  ! Concentration of the total enrofloxacin in venous blood drained from the lung, umol/L

! Liver compartment

$RL = QL * (CA_{free} - CVL) + RAO - R_{met}$  ! Rate, umol/h

$AL = \text{Integ}(RL, 0.0)$  ! Amount, umol

$CL = AL / VL$  ! Concentration of the total enrofloxacin in the liver, umol/L

$CVL = CL / PL$  ! Concentration of the total enrofloxacin in the venous blood drained from the liver, umol/L

$CL_{mg} = CL * MW_{mg}$  ! Concentration of the total enrofloxacin in the liver, mg/L (ug/g)

! Metabolism of the enrofloxacin in the liver compartment

$R_{met} = K_m * CL * VL$  ! Total hepatic metabolic rate, umol/h

$R_{met1} = R_{met} * \text{Frac}$  ! Hepatic metabolic rate to the ciprofloxacin, umol/h

$R_{met2} = R_{met} * (1 - \text{Frac})$  ! Hepatic metabolic rate to other minor metabolites, umol/h

$A_{met} = \text{Integ}(R_{met}, 0.0)$  ! Amount of the enrofloxacin that is metabolized in the liver, umol

$A_{met1} = \text{Integ}(R_{met1}, 0.0)$  ! Amount of the ciprofloxacin that is produced in the liver, umol

$A_{met2} = \text{Integ}(R_{met2}, 0.0)$  ! Amount of other minor metabolites that are produced in the liver, umol

! Kidney compartment

$RK = QK * (CA_{free} - CVK) - R_{urine}$  ! Rate, umol/h

$AK = \text{Integ}(RK, 0.0)$  ! Amount, umol

$CK = AK / VK$  ! Concentration of the total enrofloxacin in the kidney, umol/L

$CVK = CK / PK$  ! Concentration of the total enrofloxacin in the venous blood drained from the kidney, umol/L

$Ck_{mg} = CK * MW_{mg}$  ! Concentration of the total enrofloxacin in the kidney, mg/L (ug/g)

! Urinary excretion of the enrofloxacin

Rurine=Kurine\*CVK ! Rate, umol/h

Aurine=Integ(Rurine,0.0) ! Amount, umol

! Muscle compartment

RM=QM\*(CAfree-CVM) ! Rate, umol/h

AM=Integ(RM,0.0) ! Amount, umol

CM=AM/VM ! Concentration of the total enrofloxacin in the muscle, umol/L

CVM=CM/PM ! Concentration of the total enrofloxacin in the venous blood drained from the muscle, umol/L

CMmg=CM\*MWmg ! Concentration of the total enrofloxacin in the muscle, mg/L (ug/g)

! Fat compartment

RF=QF\*(CAfree-CVF) ! Rate, umol/h

AF=Integ(RF,0.0) ! Amount, umol

CF=AF/VF ! Concentration of the total enrofloxacin in the fat, umol/L

CVF=CF/PF ! Concentration of the total enrofloxacin in the venous blood drained from the fat, umol/L

CFmg=CF\*MWmg ! Concentration of the total enrofloxacin in the fat, mg/L (ug/g)

! Rest-of-body compartment

Rrest=Qrest\*(CAfree-CVrest) ! Rate, umol/h

Arest=Integ(Rrest,0.0) ! Amount, umol

Crest=Arest/Vrest ! Concentration of the total enrofloxacin in the rest-of-body, umol/L

CVrest=Crest/Prest ! Concentration of the total enrofloxacin in the venous blood drained from the rest-of-body, umol/L

! Mass balance for the enrofloxacin

Qbal=QC-QL-QK-QM-QF-Qrest ! Blood flow balance

Tmass=ABlood+AL+AK+AM+AF+Arest+ALu+Aurine+Amet ! Total amount in the body, umol

Bal=AAO+AIV+AIM+ASC-Tmass ! Mass balance, input minus output should be equal to zero at all time

! \*\*\*\*\*Sub-model for the ciprofloxacin (usually the ciprofloxacin)\*\*\*\*\*

! Venous blood/plasma

RV1=QL\*CVL1+QK\*CVK1+QM\*CVM1+QF\*CVF1+Qrest\*CVrest1-QC\*CV1 ! Rate, umol/h

AV1=Integ(RV1,0.0) ! Amount, umol



$CV1=AV1/V_{ven}$  ! Concentration of the ciprofloxacin (free plus bound), umol/L

$CV1_{free}=CV1*(1-PB1)$  ! Concentration of the ciprofloxacin that is free, umol/L

$CV1_{bound}=CV1*PB1$  ! Concentration of the ciprofloxacin that is bound, umol/L

$CV1_{mg}=CV1*MW1_{mg}$  ! Concentration of the ciprofloxacin (free plus bound), unit conversion from umol/L to mg/L (ug/g)

$CV_{totalmg}=CV_{mg}+CV1_{mg}$  ! Concentration of the enrofloxacin plus the ciprofloxacin, mg/L (ug/g)

! Arterial blood/plasma

$RA1=QC*CV_{Lu1}-QC*CA1_{free}$  ! Rate, umol/h

$AA1=Integ(RA1,0.0)$  ! Amount, umol/h

$CA1=AA1/V_{art}$  ! Concentration of the ciprofloxacin (free plus bound), umol/L

$CA1_{free}=CA1*(1-PB1)$  ! Concentration of the ciprofloxacin that is free, umol/L

$CA1_{bound}=CA1*PB1$  ! Concentration of the ciprofloxacin that is bound, umol/L

$ABlood1=AV1+AA1$  ! Amount of the ciprofloxacin in the blood, umol

! Lung compartment

$RALu1=QC*(CV1-CV_{Lu1})$  ! Rate, umol/h

$ALu1=Integ(RALu1,0.0)$  ! Amount, umol

$CLu1=ALu1/V_{Lu}$  ! Concentration of the ciprofloxacin in the lung, umol/L

$CV_{Lu1}=CLu1/PLu$  ! Concentration of the ciprofloxacin in venous blood drained from the lung, umol/L

! Liver compartment

$RL1=QL*(CA1_{free}-CV_{L1})+R_{met1}$  ! Rate, umol/h

$AL1=Integ(RL1,0.0)$  ! Amount, umol

$CL1=AL1/V_L$  ! Concentration of the ciprofloxacin in the liver, umol/L

$CV_{L1}=CL1/PL1$  ! Concentration of the ciprofloxacin in venous blood drained from the liver, umol/L

$CL1_{mg}=CL1*MW1_{mg}$  ! Concentration of the ciprofloxacin in the liver, mg/L (ug/g)

$CL_{totalmg}=CL1_{mg}+CL_{mg}$  ! Concentration of the enrofloxacin plus the ciprofloxacin, mg/L (ug/g)

! Kidney compartment

$RK1=QK*(CA1_{free}-CV_{K1})-R_{urine1}$  ! Rate, umol/h

$AK1=Integ(RK1,0.0)$  ! Amount, umol

$CK1=AK1/V_K$  ! Concentration of the ciprofloxacin in the kidney, umol/L

CVK1=CK1/PK1 ! Concentration of the ciprofloxacin in venous blood drained from the kidney, umol/L

CK1mg=CK1\*MW1mg ! Concentration of the ciprofloxacin in the kidney, mg/L (ug/g)

CKtotalmg=CK1mg+CKmg ! Concentration of the enrofloxacin plus the ciprofloxacin, mg/L (ug/g)

! Urinary excretion of the ciprofloxacin

Rurine1=Kurine1\*CVK1 ! Rate, umol/h

Aurine1=Integ(Rurine1,0.0) ! Amount, umol

! Muscle compartment

RM1=QM\*(CA1free-CVM1) ! Rate, umol/h

AM1=Integ(RM1,0.0) ! Amount, umol

CM1=AM1/VM ! Concentration of the ciprofloxacin in the muscle, umol/L

CVM1=CM1/PM1 ! Concentration of the ciprofloxacin in venous blood drained from the muscle, umol/L

CM1mg=CM1\*MW1mg ! Concentration of the ciprofloxacin in the muscle, mg/L (ug/g)

CMtotalmg=CM1mg+CMmg ! Concentration of the enrofloxacin plus the ciprofloxacin, mg/L (ug/g)

! Fat compartment

RF1=QF\*(CA1free-CVF1) ! Rate, umol/h

AF1=Integ(RF1,0.0) ! Amount, umol

CF1=AF1/VF ! Concentration of the ciprofloxacin in the fat, umol/L

CVF1=CF1/PF1 ! Concentration of the ciprofloxacin in venous blood drained from the fat, umol/L

CF1mg=CF1\*MW1mg ! Concentration of the ciprofloxacin in the fat, mg/L (ug/g)

CFtotalmg=CF1mg+CFmg ! Concentration of the enrofloxacin plus the ciprofloxacin, mg/L (ug/g)

! Rest-of-body compartment

Rrest1=Qrest\*(CA1free-CVrest1) ! Rate, umol/h

Arest1=Integ(Rrest1,0.0) ! Amount, umol

Crest1=Arest1/Vrest ! Concentration of the ciprofloxacin in the rest-of-body, umol/L

CVrest1=Crest1/Prest1 ! Concentration of the ciprofloxacin in venous blood drained from the rest-of-body, umol/L

! Mass balance for the ciprofloxacin

Tmass1=ABlood1+AL1+AK1+AM1+AF1+Arest1+ALu1+Aurine1

Bal1=Amet1-Tmass1 ! Input minus output should be equal to zero at all time

END ! DERIVATIVE

! Add discrete events here as needed

! DISCRETE

! END

! code that is executed once at each communication interval goes here

CONSTANT TSTOP = 228

TERMT (T .GE. TSTOP, 'checked on communication interval: REACHED TSTOP')

END ! DYNAMIC

TERMINAL

! code that is executed once at the end of a simulation run goes here

END ! TERMINAL

END ! PROGRAM
